# Supplementary material
Source: HighWire-hosted journal article supplement (https://openheart.bmj.com/content/12/1/e003147)
Supplement: inline-supplementary-material-4 [file inline-supplementary-material-4.pdf]

Supplementary: Table 3: Summary of Calibration Model Performance Measures for Externally Validated Laboratory-Based and Non-Laboratory-Based Equations

| Author, Year            | Equation                            | Sex    | Calibration results                                                                                                                                                     |                                                                                                                                                                        |
|-------------------------|-------------------------------------|--------|-------------------------------------------------------------------------------------------------------------------------------------------------------------------------|------------------------------------------------------------------------------------------------------------------------------------------------------------------------|
|                         | Populations for external validation |        |                                                                                                                                                                         |                                                                                                                                                                        |
|                         |                                     |        | Non-laboratory-based                                                                                                                                                    | Laboratory-based                                                                                                                                                       |
| Schiborn C et al. 2021  | EPIC-Potsdam                        |        |                                                                                                                                                                         |                                                                                                                                                                        |
|                         | Germany-Heidelberg                  | Both   | The CP was well-calibrated for the majority of individuals in the lower nine deciles of predicted risk, while it slightly overestimated the risk in the highest decile. | The CP was well-calibrated for the majority of individuals in the lower nine deciles of predicted risk, while it slightly overestimated the risk in the highest decile |
|                         |                                     |        | O: E ratio=1.05, 95%CI (0.97-1.13)                                                                                                                                      | O: E ratio=1.11, 95%CI (1.03-1.20),                                                                                                                                    |
|                         | D' Agostino Framingham              |        |                                                                                                                                                                         |                                                                                                                                                                        |
|                         | Germany - Heidelberg                | Both   | CP showed a substantial overestimation                                                                                                                                  | CP showed a substantial overestimation                                                                                                                                 |
|                         | Germany-Potsdam                     | Both   | CP showed a substantial overestimation                                                                                                                                  | CP showed a substantial overestimation                                                                                                                                 |
| Albarqouni L et al 2019 | D' Agostino Framingham              |        |                                                                                                                                                                         |                                                                                                                                                                        |
|                         | Australia                           | Female | CP showed an overestimation of the risk                                                                                                                                 | CP showed an overestimation of the risk                                                                                                                                |
|                         |                                     | Male   | CP showed an overestimation of the risk                                                                                                                                 | CP showed an overestimation of the risk                                                                                                                                |
| Al-Shamsi S et al 2020  | D' Agostino Framingham              |        |                                                                                                                                                                         |                                                                                                                                                                        |
|                         | United Arab                         | Female | CP showed an                                                                                                                                                            | CP showed an                                                                                                                                                           |

|                       |                        |        |                                                                                                                            |                                                                                                                                               |
|-----------------------|------------------------|--------|----------------------------------------------------------------------------------------------------------------------------|-----------------------------------------------------------------------------------------------------------------------------------------------|
|                       | Emirates               |        | overestimation of the risk                                                                                                 | overestimation of the risk                                                                                                                    |
|                       |                        | Male   | CP showed an overestimation of the risk                                                                                    | CP showed an overestimation of the risk                                                                                                       |
| Kariuki JK et al 2017 | D' Agostino Framingham |        |                                                                                                                            |                                                                                                                                               |
|                       | USA                    | Female | Hosmer–Lemeshow goodness-of-fit = 14.2 (p-value = 0.11); good.                                                             | Hosmer–Lemeshow goodness-of-fit = 10.5 (p-value = 0.31); good.                                                                                |
|                       |                        | Male   | Hosmer–Lemeshow goodness-of-fit = 25.8 (p-value = 0.002); poor. CP showed an overestimation of the risk in the 2nd decile. | Hosmer–Lemeshow goodness-of-fit = 21.8 (p-value = 0.01); poor. CP showed an overestimation of the risk in the 1st, 2nd, 3rd, and 4th deciles. |
|                       | INTERHEART             |        |                                                                                                                            |                                                                                                                                               |
| Joseph P et al 2018   | Africa                 | Both   | CS = 0.75, 95%CI (0.36-1.15)                                                                                               | CS= 0.98, 95%CI (0.66-1.30)                                                                                                                   |
|                       | China                  | Both   | CS= 0.81, 95%CI (0.71-0.91)                                                                                                | CS= 0.88, 95%CI (0.78-0.98)                                                                                                                   |
|                       | Middle East            | Both   | CS = 1.06, 95%CI (0.86-1.26)                                                                                               | CS = 1.41, 95%CI (1.18-1.63)                                                                                                                  |
|                       | North America/Europe   | Both   | CS = 0.77, 95%CI (0.68-0.87)                                                                                               | CS = 1.04 95%CI (0.93-1.15)                                                                                                                   |
|                       | South America          | Both   | CS = 0.87, 95%CI (0.77-0.98)                                                                                               | CS = 1.11, 95%CI (0.97-1.24)                                                                                                                  |
|                       | South Asia             | Both   | CS = 0.75, 95%CI (0.65-0.86)                                                                                               | CS = 1.04, 95%CI (0.95-1.13)                                                                                                                  |

|                           |                                                                         |       |                                                   |                                                   |
|---------------------------|-------------------------------------------------------------------------|-------|---------------------------------------------------|---------------------------------------------------|
|                           | Southeast Asia                                                          | Both  | CS = 0.92, 95%CI (0.72-1.12)                      | CS = 0.99, 95%CI (0.76-1.22)                      |
| Hassannejad R et al. 2021 | PARS/SPARS                                                              |       |                                                   |                                                   |
|                           | Iran                                                                    | Both  | slightly overestimated the event rate             | slightly overestimated the event rate             |
|                           |                                                                         |       | Nam-D'Agostino $\chi^2 = 29.89$ , p-value = 0.001 | Nam-D'Agostino $\chi^2 = 28.57$ , p-value = 0.001 |
| Ueda, P et al. 2017       | Globo-risk extension                                                    |       |                                                   |                                                   |
|                           | Australia, Iran, Scotland                                               | Both  | not reported                                      | not reported                                      |
| WHO CVD RCWG 2019         | WHO 2019                                                                |       |                                                   |                                                   |
|                           | Australia, China, Japan, Singapore, New Zealand, Iran, Thailand, and UK | Both  | not reported                                      | not reported                                      |
| Li J et al. 2021          | WHO 2019                                                                |       |                                                   |                                                   |
|                           | China                                                                   | Male  | Calibration $\chi^2 = 388.18$ , p-value < 0.001   | Calibration $\chi^2 = 321.55$ , p-value < 0.001   |
|                           |                                                                         | Women | Calibration $\chi^2 = 439.99$ , p-value < 0.001   | Calibration $\chi^2 = 280.69$ , p-value < 0.001   |

RCWG, Research Chart Working Group; CP, calibration plot; CS, calibration slope, O:E, observed: expected.
